# Supplementary material for: Propensity, free energy contributions and conformation of primary n-alcohols at a water surface
Source: Royal Society of Chemistry journal article supplement (doi:10.1039/d1cp02818a), 2021-01-01
Supplement: d1cp02818a1.pdf [file d1cp02818a1.pdf]

# Propensity, free energy contributions and conformation of primary n-alcohols at water surface

## Supporting Information

Victor Ekholm, Carl Caleman, Jochen Hub and Malin Wohlert

June 2021

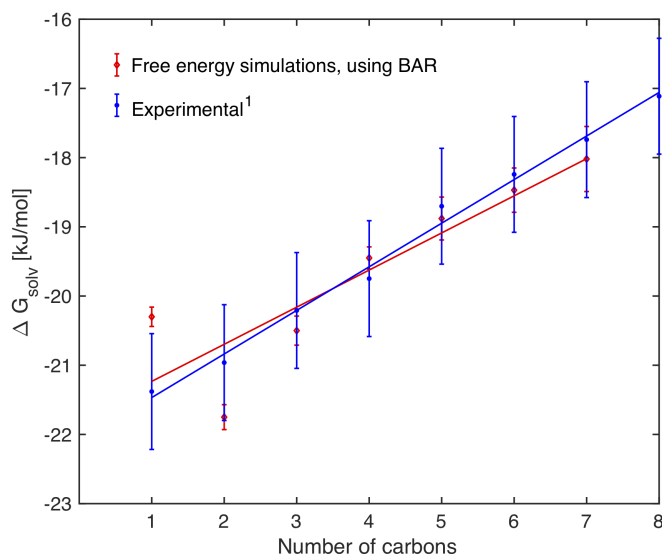

Figure S1: Free energy of solvation calculated from simulations (this study) and compared to experimental values from <sup>1</sup> Marenich, Aleksandr V *et al* Minnesota Solvation Database (MNSOL) version 2020
